# Supplementary material
Source: HighWire-hosted journal article supplement (https://erj.ersjournals.com/content/54/3/1900373)
Supplement: inline-supplementary-material-1 [file inline-supplementary-material-1.pdf]

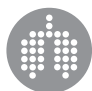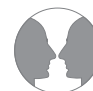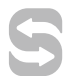

SHAREABLE PDF

# Reduced moxifloxacin exposure in patients with tuberculosis and diabetes

Bart G.J. Dekkers <sup>1</sup>, Mathieu S. Bolhuis<sup>1</sup>, Lies ter Beek<sup>2,3,4</sup>, Wiel C.M. de Lange<sup>2,3</sup>, Tjip S. van der Werf<sup>2,5</sup>, Jan-Willem C. Alffenaar<sup>1,6</sup> and Onno W. Akkerman<sup>2,3</sup>

**Affiliations:** <sup>1</sup>University of Groningen, University Medical Center Groningen, Dept of Clinical Pharmacy and Pharmacology, Groningen, The Netherlands. <sup>2</sup>University of Groningen, University Medical Center Groningen, Dept of Pulmonary Diseases and Tuberculosis, Groningen, The Netherlands. <sup>3</sup>University of Groningen, University Medical Center Groningen, Tuberculosis Center Beatrixoord, Haren, The Netherlands. <sup>4</sup>Hanze University of Applied Sciences, Nutrition and Dietetics, Groningen, The Netherlands. <sup>5</sup>University of Groningen, University Medical Center Groningen, Dept of Internal Medicine, Groningen, The Netherlands. <sup>6</sup>Sydney School of Pharmacy, Faculty of Medicine and Health, University of Sydney, Sydney, Australia.

**Correspondence:** Bart G.J. Dekkers, Dept of Clinical Pharmacy and Pharmacology, University Medical Center Groningen, University of Groningen, Hanzeplein 1, 9713 GZ Groningen, The Netherlands. E-mail: b.g.j.dekkers@umcg.nl

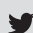

@ERSpublications

**Exposure to moxifloxacin is low in patients with tuberculosis and diabetes comorbidity due to increased clearance of the drug. As low exposure may result in poor treatment outcomes, higher moxifloxacin doses may be required for treatment success.** <http://bit.ly/2Ynxd7>

**Cite this article as:** Dekkers BGJ, Bolhuis MS, ter Beek L, *et al.* Reduced moxifloxacin exposure in patients with tuberculosis and diabetes. *Eur Respir J* 2019; 54: 1900373 [<https://doi.org/10.1183/13993003.00373-2019>].

This single-page version can be shared freely online.

## To the Editor:

Prevalence of diabetes mellitus (DM) in patients with tuberculosis (TB) is increasing and may negatively impact TB outcomes in patients with active disease [1]. Gastrointestinal problems, including gastroparesis, may result in delayed drug absorption or malabsorption in patients with DM, which may cause suboptimal drug exposure and poor outcome [2]. Studies on the pharmacokinetics of the first-line anti-TB drugs in patients with DM yielded conflicting results on low drug exposure [3–7]. Moxifloxacin is a potent bactericidal drug against *Mycobacterium tuberculosis* and is key for the treatment of multidrug-resistant tuberculosis (MDR)-TB [8]. Moreover, moxifloxacin can be recommended for TB treatment in patients with monoresistance or intolerance to first-line drugs [9]. Recently, we reported on a patient with TB and DM in whom moxifloxacin exposure was reduced [10].
